# Supplementary material for: An Integrated Approach to the Prediction of Chemotherapeutic Response in Patients with Breast Cancer
Source: PLOS journal article supplement (doi:10.1371/journal.pone.0001908), 2008-04-01
Supplement: S5 (10.1371/journal.pone.0001908.s005) [file journal.pone.0001908.s005]

**Table S1**: Ontology of genes used in the TFAC chemotherapy sensitivity signatures

| Chemotherapy Agent | Probe Set ID | Gene Symbol | Gene Title |
| --- | --- | --- | --- |
| Paclitaxel | 200722_s_at | CAPRIN1 | cell cycle associated protein 1 |
|  | 200767_s_at | FAM120A | family with sequence similarity 120A |
|  | 200796_s_at | MCL1 | myeloid cell leukemia sequence 1 (BCL2-related) |
|  | 200875_s_at | NOL5A | nucleolar protein 5A (56kDa with KKE/D repeat) |
|  | 200917_s_at | SRPR | signal recognition particle receptor ('docking protein') |
|  | 200971_s_at | SERP1 | stress-associated endoplasmic reticulum protein 1 |
|  | 201120_s_at | PGRMC1 | progesterone receptor membrane component 1 |
|  | 201282_at | OGDH | oxoglutarate (alpha-ketoglutarate) dehydrogenase (lipoamide) |
|  | 201313_at | ENO2 | enolase 2 (gamma, neuronal) |
|  | 201422_at | IFI30 | interferon, gamma-inducible protein 30 |
|  | 201500_s_at | PPP1R11 | protein phosphatase 1, regulatory (inhibitor) subunit 11 |
|  | 201556_s_at | VAMP2 | vesicle-associated membrane protein 2 (synaptobrevin 2) |
|  | 201557_at | VAMP2 | vesicle-associated membrane protein 2 (synaptobrevin 2) |
|  | 201763_s_at | DAXX | death-associated protein 6 |
|  | 201768_s_at | CLINT1 | clathrin interactor 1 |
|  | 201814_at | TBC1D5 | TBC1 domain family, member 5 |
|  | 201971_s_at | ATP6V1A | ATPase, H+ transporting, lysosomal 70kDa, V1 subunit A |
|  | 202020_s_at | LANCL1 | LanC lantibiotic synthetase component C-like 1 (bacterial) |
|  | 202117_at | ARHGAP1 | Rho GTPase activating protein 1 |
|  | 202164_s_at | CNOT8 | CCR4-NOT transcription complex, subunit 8 |
|  | 202184_s_at | NUP133 | nucleoporin 133kDa |
|  | 202188_at | NUP93 | nucleoporin 93kDa |
|  | 202313_at | PPP2R2A | protein phosphatase 2 (formerly 2A), regulatory subunit B, alpha isoform |
|  | 202345_s_at | FABP5 /// LOC728641 /// LOC729163 /// LOC731043 /// LOC732031 | fatty acid binding protein 5 (psoriasis-associated) /// similar to Fatty acid-binding protein, epidermal (E-FABP) (Psoriasis-associated fatty acid-binding protein homolog) (PA-FABP) |
|  | 202354_s_at | GTF2F1 | general transcription factor IIF, polypeptide 1, 74kDa |
|  | 202444_s_at | ERLIN1 | ER lipid raft associated 1 |
|  | 202456_s_at | ZER1 | zer-1 homolog (C. elegans) |
|  | 202516_s_at | DLG1 | discs, large homolog 1 (Drosophila) |
|  | 202680_at | GTF2E2 | general transcription factor IIE, polypeptide 2, beta 34kDa |
|  | 202702_at | TRIM26 | tripartite motif-containing 26 |
|  | 202775_s_at | SFRS8 | splicing factor, arginine/serine-rich 8 (suppressor-of-white-apricot homolog, Drosophila) |
|  | 202884_s_at | PPP2R1B | protein phosphatase 2 (formerly 2A), regulatory subunit A, beta isoform |
|  | 203073_at | COG2 | component of oligomeric golgi complex 2 |
|  | 203101_s_at | MGAT2 | mannosyl (alpha-1,6-)-glycoprotein beta-1,2-N-acetylglucosaminyltransferase |
|  | 203139_at | DAPK1 | death-associated protein kinase 1 |
|  | 203198_at | CDK9 | cyclin-dependent kinase 9 (CDC2-related kinase) |
|  | 203330_s_at | STX5 | syntaxin 5 |
|  | 203414_at | MMD | monocyte to macrophage differentiation-associated |
|  | 203678_at | MTMR15 | myotubularin related protein 15 |
|  | 203728_at | BAK1 | BCL2-antagonist/killer 1 |
|  | 203751_x_at | JUND | jun D proto-oncogene |
|  | 204090_at | STK19 | serine/threonine kinase 19 |
|  | 204210_s_at | PCYT1A | phosphate cytidylyltransferase 1, choline, alpha |
|  | 204289_at | ALDH6A1 | aldehyde dehydrogenase 6 family, member A1 |
|  | 204690_at | STX8 | syntaxin 8 |
|  | 204693_at | CDC42EP1 | CDC42 effector protein (Rho GTPase binding) 1 |
|  | 204786_s_at | IFNAR2 | interferon (alpha, beta and omega) receptor 2 |
|  | 204910_s_at | TRIM3 | tripartite motif-containing 3 |
|  | 204928_s_at | SLC10A3 | solute carrier family 10 (sodium/bile acid cotransporter family), member 3 |
|  | 205188_s_at | SMAD5 | SMAD family member 5 |
|  | 205231_s_at | EPM2A | epilepsy, progressive myoclonus type 2A, Lafora disease (laforin) |
|  | 205521_at | ENDOGL1 | endonuclease G-like 1 |
|  | 205611_at | TNFSF12 | tumor necrosis factor (ligand) superfamily, member 12 |
|  | 205620_at | F10 | coagulation factor X |
|  | 205664_at | KIN | KIN, antigenic determinant of recA protein homolog (mouse) |
|  | 205838_at | GYPA | glycophorin A (MNS blood group) |
|  | 206667_s_at | SCAMP1 | secretory carrier membrane protein 1 |
|  | 206668_s_at | SCAMP1 | secretory carrier membrane protein 1 |
|  | 206905_s_at | MATN1 | matrilin 1, cartilage matrix protein |
|  | 206939_at | DCC | deleted in colorectal carcinoma |
|  | 207093_s_at | OMG | oligodendrocyte myelin glycoprotein |
|  | 207133_x_at | ALPK1 | alpha-kinase 1 |
|  | 207185_at | SLC10A1 | solute carrier family 10 (sodium/bile acid cotransporter family), member 1 |
|  | 207283_at | RPL23AP13 | ribosomal protein L23a pseudogene 13 |
|  | 207444_at | SLC22A13 | solute carrier family 22 (organic cation transporter), member 13 |
|  | 207587_at | CRYGA | crystallin, gamma A |
|  | 207709_at | PRKAA2 | protein kinase, AMP-activated, alpha 2 catalytic subunit |
|  | 207858_s_at | PKLR | pyruvate kinase, liver and RBC |
|  | 207953_at | AD7C-NTP | neuronal thread protein AD7c-NTP |
|  | 208017_s_at | MCF2 | MCF.2 cell line derived transforming sequence |
|  | 208057_s_at | GLI2 | GLI-Kruppel family member GLI2 |
|  | 208082_x_at | --- | --- |
|  | 208168_s_at | CHIT1 | chitinase 1 (chitotriosidase) |
|  | 208223_s_at | ACVR1B | activin A receptor, type IB |
|  | 208501_at | GFI1B | growth factor independent 1B (potential regulator of CDKN1A, translocated in CML) |
|  | 208518_s_at | PER2 | period homolog 2 (Drosophila) |
|  | 208756_at | EIF3S2 | eukaryotic translation initiation factor 3, subunit 2 beta, 36kDa |
|  | 208784_s_at | KLHDC3 | kelch domain containing 3 |
|  | 208811_s_at | DNAJB6 | DnaJ (Hsp40) homolog, subfamily B, member 6 |
|  | 208867_s_at | CSNK1A1 | casein kinase 1, alpha 1 |
|  | 208870_x_at | ATP5C1 | ATP synthase, H+ transporting, mitochondrial F1 complex, gamma polypeptide 1 |
|  | 208980_s_at | UBC | ubiquitin C |
|  | 209000_s_at | 8-Sep | septin 8 |
|  | 209261_s_at | NR2F6 | nuclear receptor subfamily 2, group F, member 6 |
|  | 209279_s_at | NSDHL | NAD(P) dependent steroid dehydrogenase-like |
|  | 209294_x_at | TNFRSF10B | tumor necrosis factor receptor superfamily, member 10b |
|  | 209339_at | SIAH2 | seven in absentia homolog 2 (Drosophila) |
|  | 209423_s_at | PHF20 | PHD finger protein 20 |
|  | 209454_s_at | TEAD3 | TEA domain family member 3 |
|  | 209456_s_at | FBXW11 | F-box and WD repeat domain containing 11 |
|  | 209533_s_at | PLAA | phospholipase A2-activating protein |
|  | 209593_s_at | TOR1B | torsin family 1, member B (torsin B) |
|  | 209703_x_at | METTL7A | methyltransferase like 7A |
|  | 209742_s_at | MYL2 | myosin, light chain 2, regulatory, cardiac, slow |
|  | 209896_s_at | PTPN11 | protein tyrosine phosphatase, non-receptor type 11 (Noonan syndrome 1) |
|  | 210001_s_at | SOCS1 | suppressor of cytokine signaling 1 |
|  | 210148_at | HIPK3 | homeodomain interacting protein kinase 3 |
|  | 210405_x_at | TNFRSF10B | tumor necrosis factor receptor superfamily, member 10b |
|  | 210407_at | PPM1A | protein phosphatase 1A (formerly 2C), magnesium-dependent, alpha isoform |
|  | 210449_x_at | MAPK14 | mitogen-activated protein kinase 14 |
|  | 210465_s_at | SNAPC3 | small nuclear RNA activating complex, polypeptide 3, 50kDa |
|  | 210498_at | CLTC | clathrin, heavy chain (Hc) |
|  | 210579_s_at | TRIM10 | tripartite motif-containing 10 |
|  | 210802_s_at | DIMT1L | DIM1 dimethyladenosine transferase 1-like (S. cerevisiae) |
|  | 210934_at | BLK | B lymphoid tyrosine kinase |
|  | 211159_s_at | PPP2R5D | protein phosphatase 2, regulatory subunit B', delta isoform |
|  | 211255_x_at | DEDD | death effector domain containing |
|  | 211561_x_at | MAPK14 | mitogen-activated protein kinase 14 |
|  | 211775_x_at | MGC13053 | hypothetical MGC13053 |
|  | 211801_x_at | MFN1 | mitofusin 1 |
|  | 212002_at | --- | --- |
|  | 212026_s_at | EXOC7 | exocyst complex component 7 |
|  | 212319_at | RUTBC1 | RUN and TBC1 domain containing 1 |
|  | 212650_at | EHBP1 | EH domain binding protein 1 |
|  | 212864_at | CDS2 | CDP-diacylglycerol synthase (phosphatidate cytidylyltransferase) 2 |
|  | 213063_at | ZC3H14 | zinc finger CCCH-type containing 14 |
|  | 213064_at | ZC3H14 | zinc finger CCCH-type containing 14 |
|  | 213067_at | MYH10 | myosin, heavy chain 10, non-muscle |
|  | 213296_at | RER1 | RER1 retention in endoplasmic reticulum 1 homolog (S. cerevisiae) |
|  | 213302_at | PFAS | phosphoribosylformylglycinamidine synthase (FGAR amidotransferase) |
|  | 213490_s_at | MAP2K2 | mitogen-activated protein kinase kinase 2 |
|  | 213514_s_at | DIAPH1 | diaphanous homolog 1 (Drosophila) |
|  | 213570_at | EIF4E2 | eukaryotic translation initiation factor 4E family member 2 |
|  | 213631_x_at | --- | CDNA FLJ40920 fis, clone UTERU2005905 |
|  | 213705_at | --- | CDNA FLJ30007 fis, clone 3NB692000012 |
|  | 213756_s_at | HSF1 | heat shock transcription factor 1 |
|  | 213795_s_at | PTPRA | protein tyrosine phosphatase, receptor type, A |
|  | 213927_at | MAP3K9 | mitogen-activated protein kinase kinase kinase 9 |
|  | 213945_s_at | NUP210 | Nucleoporin 210kDa |
|  | 213977_s_at | CIZ1 | CDKN1A interacting zinc finger protein 1 |
|  | 214116_at | --- | --- |
|  | 214139_at | --- | --- |
|  | 214140_at | SLC25A16 | solute carrier family 25 (mitochondrial carrier; Graves disease autoantigen), member 16 |
|  | 214190_x_at | GGA2 | golgi associated, gamma adaptin ear containing, ARF binding protein 2 |
|  | 214251_s_at | NUMA1 | nuclear mitotic apparatus protein 1 |
|  | 214326_x_at | JUND | jun D proto-oncogene |
|  | 214379_at | --- | Transcribed locus |
|  | 214383_x_at | KLHDC3 | kelch domain containing 3 |
|  | 214533_at | CMA1 | chymase 1, mast cell |
|  | 214650_x_at | MOG | myelin oligodendrocyte glycoprotein |
|  | 214726_x_at | ADD1 | adducin 1 (alpha) |
|  | 214744_s_at | LOC646949 | Similar to ribosomal protein L23 |
|  | 214792_x_at | VAMP2 | vesicle-associated membrane protein 2 (synaptobrevin 2) |
|  | 214836_x_at | IGKC /// IGKV1-5 | immunoglobulin kappa constant /// immunoglobulin kappa variable 1-5 |
|  | 214854_at | --- | CDNA FLJ33701 fis, clone BRAWH2005524 |
|  | 214918_at | HNRPM | heterogeneous nuclear ribonucleoprotein M |
|  | 214928_at | OBSL1 | obscurin-like 1 |
|  | 215049_x_at | CD163 | CD163 molecule |
|  | 215155_at | HEXA | Hexosaminidase A (alpha polypeptide) |
|  | 215179_x_at | PGF | Placental growth factor, vascular endothelial growth factor-related protein |
|  | 215203_at | GOLGA4 | golgi autoantigen, golgin subfamily a, 4 |
|  | 215236_s_at | PICALM | phosphatidylinositol binding clathrin assembly protein |
|  | 215374_at | PAPOLA | Poly(A) polymerase alpha |
|  | 215383_x_at | SPG21 | spastic paraplegia 21 (autosomal recessive, Mast syndrome) |
|  | 215387_x_at | --- | CDNA FLJ11917 fis, clone HEMBB1000218 |
|  | 215492_x_at | PTCRA | pre T-cell antigen receptor alpha |
|  | 215595_x_at | --- | CDNA FLJ13856 fis, clone THYRO1000988 |
|  | 215597_x_at | --- | CDNA FLJ11353 fis, clone HEMBA1000042 |
|  | 215708_s_at | PRIM2A | primase, polypeptide 2A, 58kDa |
|  | 215771_x_at | RET | ret proto-oncogene |
|  | 215797_at | TRAV8-3 | T cell receptor alpha variable 8-3 |
|  | 215978_x_at | LOC152719 | hypothetical protein LOC152719 |
|  | 216000_at | KIAA0484 | KIAA0484 protein |
|  | 216048_s_at | RHOBTB3 | Rho-related BTB domain containing 3 |
|  | 216110_x_at | --- | CDNA FLJ14080 fis, clone HEMBB1002152 |
|  | 216300_x_at | RARA | retinoic acid receptor, alpha |
|  | 216310_at | TAOK1 | TAO kinase 1 |
|  | 216521_s_at | BRCC3 | BRCA1/BRCA2-containing complex, subunit 3 |
|  | 216770_at | --- | CDNA: FLJ21672 fis, clone COL09025 |
|  | 216780_at | --- | CDNA: FLJ21911 fis, clone HEP03855 |
|  | 217042_at | RDH11 | retinol dehydrogenase 11 (all-trans/9-cis/11-cis) |
|  | 217070_at | MTHFR | 5,10-methylenetetrahydrofolate reductase (NADPH) |
|  | 217125_at | --- | --- |
|  | 217208_s_at | DLG1 | discs, large homolog 1 (Drosophila) |
|  | 217280_x_at | LOC727729 | similar to gamma-aminobutyric acid (GABA) A receptor, alpha 5 |
|  | 217399_s_at | FOXO3 | forkhead box O3 |
|  | 217488_x_at | PMS2L3 | postmeiotic segregation increased 2-like 3 |
|  | 217538_at | RUTBC1 | RUN and TBC1 domain containing 1 |
|  | 217598_at | --- | Transcribed locus |
|  | 217652_at | KIAA0892 | KIAA0892 |
|  | 217713_x_at | --- | --- |
|  | 217725_x_at | SERBP1 | SERPINE1 mRNA binding protein 1 |
|  | 217883_at | C2orf25 | chromosome 2 open reading frame 25 |
|  | 217888_s_at | ARFGAP1 | ADP-ribosylation factor GTPase activating protein 1 |
|  | 217964_at | TTC19 | tetratricopeptide repeat domain 19 |
|  | 218013_x_at | DCTN4 | dynactin 4 (p62) |
|  | 218091_at | HRB | HIV-1 Rev binding protein |
|  | 218316_at | TIMM9 | translocase of inner mitochondrial membrane 9 homolog (yeast) |
|  | 218414_s_at | NDE1 | nudE nuclear distribution gene E homolog 1 (A. nidulans) |
|  | 218502_s_at | TRPS1 | trichorhinophalangeal syndrome I |
|  | 218649_x_at | SDCCAG1 | serologically defined colon cancer antigen 1 |
|  | 218821_at | NPEPL1 | aminopeptidase-like 1 |
|  | 218822_s_at | NPEPL1 | aminopeptidase-like 1 |
|  | 218855_at | GPR175 | G protein-coupled receptor 175 |
|  | 219075_at | YIPF2 | Yip1 domain family, member 2 |
|  | 219198_at | GTF3C4 | general transcription factor IIIC, polypeptide 4, 90kDa |
|  | 219244_s_at | MRPL46 | mitochondrial ribosomal protein L46 |
|  | 219254_at | FLJ22222 | hypothetical protein FLJ22222 |
|  | 219258_at | TIPIN | TIMELESS interacting protein |
|  | 219343_at | CDC37L1 | cell division cycle 37 homolog (S. cerevisiae)-like 1 |
|  | 219387_at | CCDC88A | coiled-coil domain containing 88A |
|  | 219706_at | C20orf29 | chromosome 20 open reading frame 29 |
|  | 219708_at | NT5M | 5',3'-nucleotidase, mitochondrial |
|  | 219809_at | WDR55 | WD repeat domain 55 |
|  | 220012_at | ERO1LB | ERO1-like beta (S. cerevisiae) |
|  | 220100_at | SLC22A11 | solute carrier family 22 (organic anion/cation transporter), member 11 |
|  | 220127_s_at | FBXL12 | F-box and leucine-rich repeat protein 12 |
|  | 220248_x_at | NSFL1C | NSFL1 (p97) cofactor (p47) |
|  | 220252_x_at | CXorf21 | chromosome X open reading frame 21 |
|  | 220266_s_at | KLF4 | Kruppel-like factor 4 (gut) |
|  | 220920_at | ATP10B | ATPase, Class V, type 10B |
|  | 221308_at | FRS2 | fibroblast growth factor receptor substrate 2 |
|  | 221309_at | RBM17 | RNA binding motif protein 17 |
|  | 221469_at | GPR32 | G protein-coupled receptor 32 |
|  | 221490_at | UBAP1 | ubiquitin associated protein 1 |
|  | 221603_at | PEX16 | peroxisomal biogenesis factor 16 |
|  | 221628_s_at | N-PAC | cytokine-like nuclear factor n-pac |
|  | 221695_s_at | MAP3K2 | mitogen-activated protein kinase kinase kinase 2 |
|  | 221884_at | EVI1 | ecotropic viral integration site 1 |
| Fluorouracil |  |  |  |
|  | Probe Set ID | Gene Symbol | Gene Title |
|  | 200834_s_at | RPS21 | ribosomal protein S21 |
|  | 201781_s_at | AIP | aryl hydrocarbon receptor interacting protein |
|  | 201782_s_at | AIP | aryl hydrocarbon receptor interacting protein |
|  | 203584_at | TTC35 | tetratricopeptide repeat domain 35 |
|  | 203750_s_at | RARA | retinoic acid receptor, alpha |
|  | 204426_at | TMED2 | transmembrane emp24 domain trafficking protein 2 |
|  | 205277_at | PRDM2 | PR domain containing 2, with ZNF domain |
|  | 205738_s_at | FABP3 | fatty acid binding protein 3, muscle and heart (mammary-derived growth inhibitor) |
|  | 206147_x_at | SCML2 | sex comb on midleg-like 2 (Drosophila) |
|  | 206568_at | TNP1 | transition protein 1 (during histone to protamine replacement) |
|  | 207039_at | CDKN2A | cyclin-dependent kinase inhibitor 2A (melanoma, p16, inhibits CDK4) |
|  | 207123_s_at | MATN4 | matrilin 4 |
|  | 207813_s_at | FDXR | ferredoxin reductase |
|  | 208723_at | USP11 | ubiquitin specific peptidase 11 |
|  | 208880_s_at | PRPF6 | PRP6 pre-mRNA processing factor 6 homolog (S. cerevisiae) |
|  | 209644_x_at | CDKN2A | cyclin-dependent kinase inhibitor 2A (melanoma, p16, inhibits CDK4) |
|  | 210245_at | ABCC8 | ATP-binding cassette, sub-family C (CFTR/MRP), member 8 |
|  | 210595_at | ZNF235 | zinc finger protein 235 |
|  | 210819_x_at | DIO2 | deiodinase, iodothyronine, type II |
|  | 211399_at | FGFR2 | fibroblast growth factor receptor 2 (bacteria-expressed kinase, keratinocyte growth factor receptor, craniofacial dysostosis 1, Crouzon syndrome, Pfeiffer syndrome, Jackson-Weiss syndrome) |
|  | 211564_s_at | PDLIM4 | PDZ and LIM domain 4 |
|  | 211581_x_at | LST1 | leukocyte specific transcript 1 |
|  | 212413_at | 6-Sep | septin 6 |
|  | 212414_s_at | N-PAC /// SEPT6 | septin 6 /// cytokine-like nuclear factor n-pac |
|  | 213614_x_at | EEF1A1 | eukaryotic translation elongation factor 1 alpha 1 |
|  | 213655_at | YWHAE | Tyrosine 3-monooxygenase/tryptophan 5-monooxygenase activation protein, epsilon polypeptide |
|  | 214175_x_at | PDLIM4 | PDZ and LIM domain 4 |
|  | 214527_s_at | PQBP1 | polyglutamine binding protein 1 |
|  | 215096_s_at | ESD | esterase D/formylglutathione hydrolase |
|  | 215693_x_at | DDX27 | DEAD (Asp-Glu-Ala-Asp) box polypeptide 27 |
|  | 215919_s_at | MRPS11 | mitochondrial ribosomal protein S11 |
|  | 215993_at | --- | Clone 24740 mRNA sequence |
|  | 216071_x_at | MED12 | mediator of RNA polymerase II transcription, subunit 12 homolog (S. cerevisiae) |
|  | 216294_s_at | KIAA1109 | KIAA1109 |
|  | 216386_at | LOC220077 | hypothetical gene supported by AF229166 |
|  | 217005_at | LDLR | low density lipoprotein receptor (familial hypercholesterolemia) |
|  | 217013_at | LOC646282 | similar to alpha-2-glycoprotein 1, zinc |
|  | 217071_s_at | MTHFR | 5,10-methylenetetrahydrofolate reductase (NADPH) |
|  | 217158_at | LOC728683 | similar to Prostaglandin E2 receptor, EP4 subtype (Prostanoid EP4 receptor) (PGE receptor, EP4 subtype) |
|  | 217603_at | ATP6V0A2 | ATPase, H+ transporting, lysosomal V0 subunit a2 |
|  | 218212_s_at | MOCS2 | molybdenum cofactor synthesis 2 |
|  | 218414_s_at | NDE1 | nudE nuclear distribution gene E homolog 1 (A. nidulans) |
|  | 219421_at | TTC33 | tetratricopeptide repeat domain 33 |
|  | 220012_at | ERO1LB | ERO1-like beta (S. cerevisiae) |
|  | 220491_at | HAMP | hepcidin antimicrobial peptide |
|  | 220992_s_at | C1orf25 | chromosome 1 open reading frame 25 |
|  | 221072_at | C9orf31 | chromosome 9 open reading frame 31 |
|  | 221378_at | CER1 | cerberus 1, cysteine knot superfamily, homolog (Xenopus laevis) |
|  | 222345_at | --- | Transcribed locus |
|  | 78047_s_at | LOC729580 /// LOC730672 | hypothetical protein LOC729580 /// hypothetical protein LOC730672 |
| Adriamycin |  |  |  |
|  | 200606_at | DSP | desmoplakin |
|  | 200665_s_at | SPARC | secreted protein, acidic, cysteine-rich (osteonectin) |
|  | 200696_s_at | GSN | gelsolin (amyloidosis, Finnish type) |
|  | 200821_at | LAMP2 | lysosomal-associated membrane protein 2 |
|  | 200965_s_at | ABLIM1 | actin binding LIM protein 1 |
|  | 201015_s_at | JUP | junction plakoglobin |
|  | 201079_at | SYNGR2 | synaptogyrin 2 |
|  | 201089_at | ATP6V1B2 | ATPase, H+ transporting, lysosomal 56/58kDa, V1 subunit B2 |
|  | 201141_at | GPNMB | glycoprotein (transmembrane) nmb |
|  | 201220_x_at | CTBP2 | C-terminal binding protein 2 |
|  | 201318_s_at | MRCL3 /// MRLC2 | myosin regulatory light chain MRCL3 /// myosin regulatory light chain MRLC2 |
|  | 201380_at | CRTAP | cartilage associated protein |
|  | 201578_at | PODXL | podocalyxin-like |
|  | 201580_s_at | TXNDC13 | thioredoxin domain containing 13 |
|  | 201596_x_at | KRT18 | keratin 18 |
|  | 201645_at | TNC | tenascin C (hexabrachion) |
|  | 201650_at | KRT19 | keratin 19 |
|  | 201717_at | MRPL49 | mitochondrial ribosomal protein L49 |
|  | 201739_at | SGK | serum/glucocorticoid regulated kinase |
|  | 201839_s_at | TACSTD1 | tumor-associated calcium signal transducer 1 |
|  | 201860_s_at | PLAT | plasminogen activator, tissue |
|  | 201984_s_at | EGFR | epidermal growth factor receptor (erythroblastic leukemia viral (v-erb-b) oncogene homolog, avian) |
|  | 202125_s_at | TRAK2 | trafficking protein, kinesin binding 2 |
|  | 202185_at | PLOD3 | procollagen-lysine, 2-oxoglutarate 5-dioxygenase 3 |
|  | 202191_s_at | GAS7 | growth arrest-specific 7 |
|  | 202260_s_at | STXBP1 | syntaxin binding protein 1 |
|  | 202267_at | LAMC2 | laminin, gamma 2 |
|  | 202546_at | VAMP8 | vesicle-associated membrane protein 8 (endobrevin) |
|  | 202556_s_at | MCRS1 | microspherule protein 1 |
|  | 202734_at | TRIP10 | thyroid hormone receptor interactor 10 |
|  | 202742_s_at | PRKACB | protein kinase, cAMP-dependent, catalytic, beta |
|  | 202827_s_at | MMP14 | matrix metallopeptidase 14 (membrane-inserted) |
|  | 202947_s_at | GYPC | glycophorin C (Gerbich blood group) |
|  | 202986_at | ARNT2 | aryl-hydrocarbon receptor nuclear translocator 2 |
|  | 203028_s_at | CYBA | cytochrome b-245, alpha polypeptide |
|  | 203042_at | LAMP2 | lysosomal-associated membrane protein 2 |
|  | 203114_at | SSSCA1 | Sjogren's syndrome/scleroderma autoantigen 1 |
|  | 203279_at | EDEM1 | ER degradation enhancer, mannosidase alpha-like 1 |
|  | 203518_at | LYST | lysosomal trafficking regulator |
|  | 203522_at | CCS | copper chaperone for superoxide dismutase |
|  | 203542_s_at | KLF9 | Kruppel-like factor 9 |
|  | 203543_s_at | KLF9 | Kruppel-like factor 9 |
|  | 203557_s_at | PCBD1 | pterin-4 alpha-carbinolamine dehydratase/dimerization cofactor of hepatocyte nuclear factor 1 alpha (TCF1) |
|  | 203585_at | ZNF185 | zinc finger protein 185 (LIM domain) |
|  | 203603_s_at | ZEB2 | zinc finger E-box binding homeobox 2 |
|  | 203607_at | INPP5F | inositol polyphosphate-5-phosphatase F |
|  | 203713_s_at | LLGL2 | lethal giant larvae homolog 2 (Drosophila) |
|  | 203777_s_at | RPS6KB2 | ribosomal protein S6 kinase, 70kDa, polypeptide 2 |
|  | 203845_at | PCAF | p300/CBP-associated factor |
|  | 204040_at | RNF144 | ring finger protein 144 |
|  | 204140_at | TPST1 | tyrosylprotein sulfotransferase 1 |
|  | 204271_s_at | EDNRB | endothelin receptor type B |
|  | 204569_at | ICK | intestinal cell (MAK-like) kinase |
|  | 204765_at | ARHGEF5 | Rho guanine nucleotide exchange factor (GEF) 5 |
|  | 204774_at | EVI2A | ecotropic viral integration site 2A |
|  | 204857_at | MAD1L1 | MAD1 mitotic arrest deficient-like 1 (yeast) |
|  | 204927_at | RASSF7 | Ras association (RalGDS/AF-6) domain family 7 |
|  | 204955_at | SRPX | sushi-repeat-containing protein, X-linked |
|  | 205190_at | PLS1 | plastin 1 (I isoform) |
|  | 205227_at | IL1RAP | interleukin 1 receptor accessory protein |
|  | 205245_at | PARD6A | par-6 partitioning defective 6 homolog alpha (C. elegans) |
|  | 205379_at | CBR3 | carbonyl reductase 3 |
|  | 205880_at | PRKD1 | protein kinase D1 |
|  | 206232_s_at | B4GALT6 | UDP-Gal:betaGlcNAc beta 1,4- galactosyltransferase, polypeptide 6 |
|  | 206560_s_at | MIA | melanoma inhibitory activity |
|  | 206665_s_at | BCL2L1 | BCL2-like 1 |
|  | 206687_s_at | PTPN6 | protein tyrosine phosphatase, non-receptor type 6 |
|  | 206701_x_at | EDNRB | endothelin receptor type B |
|  | 206704_at | CLCN5 | chloride channel 5 (nephrolithiasis 2, X-linked, Dent disease) |
|  | 206717_at | MYH8 | myosin, heavy chain 8, skeletal muscle, perinatal |
|  | 207080_s_at | PYY | peptide YY |
|  | 207144_s_at | CITED1 | Cbp/p300-interacting transactivator, with Glu/Asp-rich carboxy-terminal domain, 1 |
|  | 207384_at | PGLYRP1 | peptidoglycan recognition protein 1 |
|  | 208112_x_at | EHD1 | EH-domain containing 1 |
|  | 208370_s_at | DSCR1 | Down syndrome critical region gene 1 |
|  | 208582_s_at | DUX1 /// DUX3 /// DUX5 | double homeobox, 5 /// double homeobox, 3 /// double homeobox, 1 |
|  | 208600_s_at | GPR39 | G protein-coupled receptor 39 |
|  | 208613_s_at | FLNB | filamin B, beta (actin binding protein 278) |
|  | 208621_s_at | VIL2 | villin 2 (ezrin) |
|  | 208622_s_at | VIL2 | villin 2 (ezrin) |
|  | 208650_s_at | CD24 | CD24 molecule |
|  | 208651_x_at | CD24 | CD24 molecule |
|  | 209008_x_at | KRT8 | keratin 8 |
|  | 209167_at | GPM6B | glycoprotein M6B |
|  | 209169_at | GPM6B | glycoprotein M6B |
|  | 209170_s_at | GPM6B | glycoprotein M6B |
|  | 209199_s_at | MEF2C | myocyte enhancer factor 2C |
|  | 209200_at | MEF2C | myocyte enhancer factor 2C |
|  | 209211_at | KLF5 | Kruppel-like factor 5 (intestinal) |
|  | 209212_s_at | KLF5 | Kruppel-like factor 5 (intestinal) |
|  | 209236_at | SLC23A2 | solute carrier family 23 (nucleobase transporters), member 2 |
|  | 209365_s_at | ECM1 | extracellular matrix protein 1 |
|  | 209369_at | ANXA3 | annexin A3 |
|  | 209610_s_at | SLC1A4 | solute carrier family 1 (glutamate/neutral amino acid transporter), member 4 |
|  | 209686_at | S100B | S100 calcium binding protein B |
|  | 209759_s_at | DCI | dodecenoyl-Coenzyme A delta isomerase (3,2 trans-enoyl-Coenzyme A isomerase) |
|  | 209771_x_at | CD24 | CD24 molecule |
|  | 209772_s_at | CD24 | CD24 molecule |
|  | 209800_at | KRT16 | keratin 16 (focal non-epidermolytic palmoplantar keratoderma) |
|  | 209842_at | SOX10 | SRY (sex determining region Y)-box 10 |
|  | 209873_s_at | PKP3 | plakophilin 3 |
|  | 209925_at | NAIP /// OCLN | occludin /// similar to Occludin |
|  | 210068_s_at | AQP4 | aquaporin 4 |
|  | 210094_s_at | PARD3 | par-3 partitioning defective 3 homolog (C. elegans) |
|  | 210105_s_at | FYN | FYN oncogene related to SRC, FGR, YES |
|  | 210130_s_at | TM7SF2 | transmembrane 7 superfamily member 2 |
|  | 210139_s_at | PMP22 | peripheral myelin protein 22 |
|  | 210150_s_at | LAMA5 | laminin, alpha 5 |
|  | 210198_s_at | PLP1 | proteolipid protein 1 (Pelizaeus-Merzbacher disease, spastic paraplegia 2, uncomplicated) |
|  | 210433_at | POFUT1 | protein O-fucosyltransferase 1 |
|  | 210554_s_at | CTBP2 | C-terminal binding protein 2 |
|  | 210654_at | TNFRSF10D | tumor necrosis factor receptor superfamily, member 10d, decoy with truncated death domain |
|  | 210715_s_at | SPINT2 | serine peptidase inhibitor, Kunitz type, 2 |
|  | 210827_s_at | ELF3 | E74-like factor 3 (ets domain transcription factor, epithelial-specific ) |
|  | 210872_x_at | GAS7 | growth arrest-specific 7 |
|  | 210984_x_at | EGFR | epidermal growth factor receptor (erythroblastic leukemia viral (v-erb-b) oncogene homolog, avian) |
|  | 211067_s_at | GAS7 | growth arrest-specific 7 |
|  | 211078_s_at | STK3 | serine/threonine kinase 3 (STE20 homolog, yeast) |
|  | 212312_at | BCL2L1 | BCL2-like 1 |
|  | 212423_at | C10orf56 | chromosome 10 open reading frame 56 |
|  | 212793_at | DAAM2 | dishevelled associated activator of morphogenesis 2 |
|  | 212810_s_at | SLC1A4 | solute carrier family 1 (glutamate/neutral amino acid transporter), member 4 |
|  | 212915_at | PDZRN3 | PDZ domain containing RING finger 3 |
|  | 212925_at | C19orf21 | chromosome 19 open reading frame 21 |
|  | 213085_s_at | WWC1 | WW and C2 domain containing 1 |
|  | 213139_at | SNAI2 | snail homolog 2 (Drosophila) |
|  | 213236_at | SASH1 | SAM and SH3 domain containing 1 |
|  | 213249_at | FBXL7 | F-box and leucine-rich repeat protein 7 |
|  | 213466_at | RAB40C | RAB40C, member RAS oncogene family |
|  | 213600_at | SIPA1L3 | signal-induced proliferation-associated 1 like 3 |
|  | 213836_s_at | WIPI1 | WD repeat domain, phosphoinositide interacting 1 |
|  | 214575_s_at | AZU1 | azurocidin 1 (cationic antimicrobial protein 37) |
|  | 214599_at | IVL | involucrin |
|  | 214623_at | SHFM3P1 | split hand/foot malformation (ectrodactyly) type 3 pseudogene 1 |
|  | 214755_at | UAP1L1 | UDP-N-acteylglucosamine pyrophosphorylase 1-like 1 |
|  | 215796_at | --- | T-cell receptor active alpha-chain V-region (V-J-C) mRNA, partial cds, clone AG212 |
|  | 216033_s_at | FYN | FYN oncogene related to SRC, FGR, YES |
|  | 216074_x_at | WWC1 | WW and C2 domain containing 1 |
|  | 216135_at | IQCK | IQ motif containing K |
|  | 216244_at | IL1RN | interleukin 1 receptor antagonist |
|  | 216379_x_at | CD24 | CD24 molecule |
|  | 216568_x_at | --- | --- |
|  | 216581_at | KRT18P38 | keratin 18 pseudogene 38 |
|  | 216585_at | --- | --- |
|  | 216808_at | KRT18P27 /// LOC647511 | keratin 27 pseudogene 27 /// similar to Keratin, type I cytoskeletal 18 (Cytokeratin-18) (CK-18) (Keratin-18) (K18) |
|  | 216821_at | hCG_1988300 /// KRT8 /// KRT8P10 /// KRT8P7 /// KRT8P9 /// LOC149501 /// LOC647954 /// LOC649344 /// LOC728167 /// LOC730680 | keratin 8 /// similar to Keratin, type II cytoskeletal 8 (Cytokeratin-8) (CK-8) (Keratin-8) (K8) /// keratin 8 pseudogene 10 /// keratin 8 pseudogene 9 /// similar to Keratin, type II cytoskeletal 8 (Cytokeratin-8) (CK-8) (Keraton-8) (K8) /// similar to tau tubulin kinase 2 /// hCG1988300 /// keratin 8 pseudogene 7 |
|  | 217000_at | KRT18P50 | keratin 18 pseudogene 50 |
|  | 217149_x_at | TNK1 | tyrosine kinase, non-receptor, 1 |
|  | 217155_at | --- | --- |
|  | 217175_at | UGT2B15 | UDP glucuronosyltransferase 2 family, polypeptide B15 |
|  | 217234_s_at | VIL2 | villin 2 (ezrin) |
|  | 217351_at | KRT8P17 | keratin 8 pseudogene 17 |
|  | 217848_s_at | PPA1 | pyrophosphatase (inorganic) 1 |
|  | 217867_x_at | BACE2 | beta-site APP-cleaving enzyme 2 |
|  | 217939_s_at | AFTPH | aftiphilin |
|  | 217969_at | C11orf2 | chromosome 11 open reading frame2 |
|  | 218180_s_at | EPS8L2 | EPS8-like 2 |
|  | 218196_at | OSTM1 | osteopetrosis associated transmembrane protein 1 |
|  | 218205_s_at | MKNK2 | MAP kinase interacting serine/threonine kinase 2 |
|  | 218237_s_at | SLC38A1 | solute carrier family 38, member 1 |
|  | 218394_at | ROGDI | rogdi homolog (Drosophila) |
|  | 218494_s_at | SLC2A4RG | SLC2A4 regulator |
|  | 218550_s_at | LRRC20 | leucine rich repeat containing 20 |
|  | 218625_at | NRN1 | neuritin 1 |
|  | 218734_at | NAT11 | N-acetyltransferase 11 |
|  | 218860_at | NOC4L | nucleolar complex associated 4 homolog (S. cerevisiae) |
|  | 219010_at | C1orf106 | chromosome 1 open reading frame 106 |
|  | 219042_at | LZTS1 | leucine zipper, putative tumor suppressor 1 |
|  | 219045_at | RHOF | ras homolog gene family, member F (in filopodia) |
|  | 219058_x_at | TINAGL1 | tubulointerstitial nephritis antigen-like 1 |
|  | 219096_at | ARMC7 | armadillo repeat containing 7 |
|  | 219162_s_at | MRPL11 | mitochondrial ribosomal protein L11 |
|  | 219242_at | CEP63 | centrosomal protein 63kDa |
|  | 219279_at | DOCK10 | dedicator of cytokinesis 10 |
|  | 219301_s_at | CNTNAP2 | contactin associated protein-like 2 |
|  | 219355_at | CXorf57 | chromosome X open reading frame 57 |
|  | 219442_at | C16orf67 | chromosome 16 open reading frame 67 |
|  | 219572_at | CADPS2 | Ca2+-dependent activator protein for secretion 2 |
|  | 219628_at | ZMAT3 | zinc finger, matrin type 3 |
|  | 219926_at | POPDC3 | popeye domain containing 3 |
|  | 220425_x_at | ROPN1B | ropporin, rhophilin associated protein 1B |
|  | 220434_at | ADCK4 | aarF domain containing kinase 4 |
|  | 220602_s_at | FLJ22795 /// LOC388152 /// LOC388161 /// LOC727751 | hypothetical protein FLJ22795 /// hypothetical protein FLJ90297 /// LOC388161 /// similar to cis-Golgi matrix protein GM130 |
|  | 220843_s_at | WDSOF1 | WD repeats and SOF1 domain containing |
|  | 221474_at | MRLC2 | myosin regulatory light chain MRLC2 |
|  | 221526_x_at | PARD3 | par-3 partitioning defective 3 homolog (C. elegans) |
|  | 221664_s_at | F11R | F11 receptor |
|  | 222129_at | C2orf17 | Chromosome 2 open reading frame 17 |
|  | 222169_x_at | SH2D3A | SH2 domain containing 3A |
|  | 222199_s_at | BIN3 | bridging integrator 3 |
|  | 222221_x_at | EHD1 | EH-domain containing 1 |
|  | 266_s_at | CD24 | CD24 molecule |
|  | 31846_at | RHOD | ras homolog gene family, member D |
|  | 33322_i_at | SFN | stratifin |
|  | 33323_r_at | SFN | stratifin |
|  | 36711_at | MAFF | v-maf musculoaponeurotic fibrosarcoma oncogene homolog F (avian) |
|  | 37831_at | SIPA1L3 | signal-induced proliferation-associated 1 like 3 |
|  | 38710_at | OTUB1 | OTU domain, ubiquitin aldehyde binding 1 |
|  | 38766_at | SRCAP | Snf2-related CBP activator protein |
|  | 40359_at | RASSF7 | Ras association (RalGDS/AF-6) domain family 7 |
| Cyclophosphamide |  |  |  |
|  | 200755_s_at | CALU | calumenin |
|  | 200788_s_at | PEA15 | phosphoprotein enriched in astrocytes 15 |
|  | 201045_s_at | RAB6A | RAB6A, member RAS oncogene family |
|  | 201305_x_at | ANP32B | acidic (leucine-rich) nuclear phosphoprotein 32 family, member B |
|  | 201376_s_at | HNRPF | heterogeneous nuclear ribonucleoprotein F |
|  | 201586_s_at | SFPQ | splicing factor proline/glutamine-rich (polypyrimidine tract binding protein associated) |
|  | 201860_s_at | PLAT | plasminogen activator, tissue |
|  | 202264_s_at | TOMM40 | translocase of outer mitochondrial membrane 40 homolog (yeast) |
|  | 202392_s_at | PISD | phosphatidylserine decarboxylase |
|  | 202440_s_at | ST5 | suppression of tumorigenicity 5 |
|  | 202482_x_at | RANBP1 | RAN binding protein 1 |
|  | 202556_s_at | MCRS1 | microspherule protein 1 |
|  | 202773_s_at | SFRS8 | splicing factor, arginine/serine-rich 8 (suppressor-of-white-apricot homolog, Drosophila) |
|  | 202986_at | ARNT2 | aryl-hydrocarbon receptor nuclear translocator 2 |
|  | 203046_s_at | TIMELESS | timeless homolog (Drosophila) |
|  | 203082_at | BMS1 | BMS1 homolog, ribosome assembly protein (yeast) |
|  | 203091_at | FUBP1 | far upstream element (FUSE) binding protein 1 |
|  | 203174_s_at | ARFRP1 | ADP-ribosylation factor related protein 1 |
|  | 203193_at | ESRRA | estrogen-related receptor alpha |
|  | 203321_s_at | ZNF508 | zinc finger protein 508 |
|  | 203322_at | ZNF508 | zinc finger protein 508 |
|  | 203451_at | LDB1 | LIM domain binding 1 |
|  | 203469_s_at | CDK10 | cyclin-dependent kinase (CDC2-like) 10 |
|  | 203576_at | BCAT2 | branched chain aminotransferase 2, mitochondrial |
|  | 203670_at | TTLL3 | tubulin tyrosine ligase-like family, member 3 |
|  | 203737_s_at | PPRC1 | peroxisome proliferator-activated receptor gamma, coactivator-related 1 |
|  | 203785_s_at | DDX28 | DEAD (Asp-Glu-Ala-Asp) box polypeptide 28 |
|  | 203825_at | BRD3 | bromodomain containing 3 |
|  | 203832_at | SNRPF | small nuclear ribonucleoprotein polypeptide F |
|  | 203876_s_at | MMP11 | matrix metallopeptidase 11 (stromelysin 3) |
|  | 204056_s_at | MVK | mevalonate kinase (mevalonic aciduria) |
|  | 204282_s_at | FARS2 | phenylalanyl-tRNA synthetase 2, mitochondrial |
|  | 204292_x_at | STK11 | serine/threonine kinase 11 |
|  | 204413_at | TRAF2 | TNF receptor-associated factor 2 |
|  | 204660_at | GFER | growth factor, augmenter of liver regeneration (ERV1 homolog, S. cerevisiae) |
|  | 205053_at | PRIM1 | primase, polypeptide 1, 49kDa |
|  | 205079_s_at | MPDZ | multiple PDZ domain protein |
|  | 205113_at | NEFM | neurofilament, medium polypeptide 150kDa |
|  | 205333_s_at | RCE1 | RCE1 homolog, prenyl protein peptidase (S. cerevisiae) |
|  | 205424_at | TBKBP1 | TBK1 binding protein 1 |
|  | 205766_at | TCAP | titin-cap (telethonin) |
|  | 206093_x_at | TNXB | tenascin XB |
|  | 206257_at | CCDC9 | coiled-coil domain containing 9 |
|  | 206304_at | MYBPH | myosin binding protein H |
|  | 206526_at | RIBC2 | RIB43A domain with coiled-coils 2 |
|  | 206817_x_at | TNRC4 | trinucleotide repeat containing 4 |
|  | 206933_s_at | H6PD | hexose-6-phosphate dehydrogenase (glucose 1-dehydrogenase) |
|  | 206983_at | CCR6 | chemokine (C-C motif) receptor 6 |
|  | 207278_s_at | CD209 | CD209 molecule |
|  | 207457_s_at | LY6G6D | lymphocyte antigen 6 complex, locus G6D |
|  | 207914_x_at | EVX1 | even-skipped homeobox 1 |
|  | 208176_at | DUX1 | double homeobox, 1 |
|  | 208299_at | CACNA1I | calcium channel, voltage-dependent, T type, alpha 1I subunit |
|  | 208449_s_at | FGF8 | fibroblast growth factor 8 (androgen-induced) |
|  | 209288_s_at | CDC42EP3 | CDC42 effector protein (Rho GTPase binding) 3 |
|  | 210364_at | SCN2B | sodium channel, voltage-gated, type II, beta |
|  | 210921_at | --- | --- |
|  | 211115_x_at | SIP1 | survival of motor neuron protein interacting protein 1 |
|  | 211301_at | KCND3 | potassium voltage-gated channel, Shal-related subfamily, member 3 |
|  | 211886_s_at | TBX5 | T-box 5 |
|  | 211949_s_at | NOLC1 | nucleolar and coiled-body phosphoprotein 1 |
|  | 212036_s_at | PNN | pinin, desmosome associated protein |
|  | 212088_at | PMPCA | peptidase (mitochondrial processing) alpha |
|  | 212139_at | GCN1L1 | GCN1 general control of amino-acid synthesis 1-like 1 (yeast) |
|  | 212165_at | TMEM183A /// TMEM183B | transmembrane protein 183A /// transmembrane protein 183B |
|  | 212252_at | CAMKK2 | calcium/calmodulin-dependent protein kinase kinase 2, beta |
|  | 212275_s_at | SRCAP | Snf2-related CBP activator protein |
|  | 212278_x_at | UBE3A | ubiquitin protein ligase E3A (human papilloma virus E6-associated protein, Angelman syndrome) |
|  | 212516_at | CENTD2 | centaurin, delta 2 |
|  | 212626_x_at | HNRPC | heterogeneous nuclear ribonucleoprotein C (C1/C2) |
|  | 212691_at | NUP188 | nucleoporin 188kDa |
|  | 212923_s_at | C6orf145 | chromosome 6 open reading frame 145 |
|  | 213053_at | KIAA0841 | KIAA0841 |
|  | 213138_at | ARID5A | AT rich interactive domain 5A (MRF1-like) |
|  | 213139_at | SNAI2 | snail homolog 2 (Drosophila) |
|  | 213196_at | ZNF629 | zinc finger protein 629 |
|  | 213202_at | SETD1A | SET domain containing 1A |
|  | 213223_at | RPL28 | ribosomal protein L28 |
|  | 213235_at | LOC400506 | similar to TSG118.1 |
|  | 213306_at | MPDZ | multiple PDZ domain protein |
|  | 214002_at | MYL6 | myosin, light chain 6, alkali, smooth muscle and non-muscle |
|  | 214223_at | --- | Transcribed locus, strongly similar to XP_001148966.1 hypothetical protein [Pan troglodytes] |
|  | 214240_at | GAL | galanin |
|  | 214311_at | ZFPL1 | zinc finger protein-like 1 |
|  | 214317_x_at | RPS9 | Ribosomal protein S9 |
|  | 214338_at | DNAJB12 | DnaJ (Hsp40) homolog, subfamily B, member 12 |
|  | 214507_s_at | EXOSC2 | exosome component 2 |
|  | 214880_x_at | CALD1 | caldesmon 1 |
|  | 214935_at | IL4I1 /// NUP62 | nucleoporin 62kDa /// interleukin 4 induced 1 |
|  | 215410_at | LOC392713 /// LOC441259 /// LOC729425 /// LOC729453 /// LOC730323 /// LOC730324 /// LOC730505 /// PMS2L1 /// PMS2L2 /// PMS2L5 | postmeiotic segregation increased 2-like 1 /// postmeiotic segregation increased 2-like 2 /// postmeiotic segregation increased 2-like 5 /// similar to PMS1 protein homolog 2 (DNA mismatch repair protein PMS2) /// similar to postmeiotic segregation increased 2-like 2 |
|  | 215502_at | --- | IMAGE cDNA clone 26881 |
|  | 215741_x_at | AKAP8L | A kinase (PRKA) anchor protein 8-like |
|  | 215908_at | --- | Clone FBA1 Cri-du-chat region mRNA |
|  | 215979_s_at | SLC7A1 | solute carrier family 7 (cationic amino acid transporter, y+ system), member 1 |
|  | 216232_s_at | GCN1L1 | GCN1 general control of amino-acid synthesis 1-like 1 (yeast) |
|  | 216383_at | hCG_2040224 /// LOC285053 /// LOC390354 /// LOC650986 /// LOC729955 /// RPL18A | ribosomal protein L18a /// similar to ribosomal protein L18a /// hCG2040224 /// similar to ribosomal protein L18a; 60S ribosomal protein L18a |
|  | 216485_s_at | TPSAB1 | tryptase alpha/beta 1 |
|  | 216889_s_at | HNF4A | hepatocyte nuclear factor 4, alpha |
|  | 216940_x_at | --- | --- |
|  | 217054_at | --- | CDNA FLJ39484 fis, clone PROST2014925 |
|  | 217203_at | LOC401708 | similar to Glutamine synthetase (Glutamate--ammonia ligase) (GS) |
|  | 217912_at | DUS1L | dihydrouridine synthase 1-like (S. cerevisiae) |
|  | 218001_at | MRPS2 | mitochondrial ribosomal protein S2 |
|  | 218022_at | VRK3 | vaccinia related kinase 3 |
|  | 218083_at | PTGES2 | prostaglandin E synthase 2 |
|  | 218524_at | E4F1 | E4F transcription factor 1 |
|  | 218551_at | RP5-1077B9.4 | invasion inhibitory protein 45 |
|  | 218555_at | ANAPC2 | anaphase promoting complex subunit 2 |
|  | 218575_at | ANAPC1 | anaphase promoting complex subunit 1 |
|  | 218630_at | MKS1 | Meckel syndrome, type 1 |
|  | 218670_at | PUS1 | pseudouridylate synthase 1 |
|  | 218707_at | ZNF444 | zinc finger protein 444 |
|  | 218745_x_at | TMEM161A | transmembrane protein 161A |
|  | 218758_s_at | RRP1 | ribosomal RNA processing 1 homolog (S. cerevisiae) |
|  | 218778_x_at | EPS8L1 | EPS8-like 1 |
|  | 218787_x_at | CWF19L1 | CWF19-like 1, cell cycle control (S. pombe) |
|  | 218798_at | FLJ12949 | hypothetical protein FLJ12949 |
|  | 218860_at | NOC4L | nucleolar complex associated 4 homolog (S. cerevisiae) |
|  | 218964_at | ARID3B | AT rich interactive domain 3B (BRIGHT-like) |
|  | 218998_at | C9orf6 | chromosome 9 open reading frame 6 |
|  | 219019_at | --- | --- |
|  | 219063_at | C1orf35 | chromosome 1 open reading frame 35 |
|  | 219096_at | ARMC7 | armadillo repeat containing 7 |
|  | 219111_s_at | DDX54 | DEAD (Asp-Glu-Ala-Asp) box polypeptide 54 |
|  | 219344_at | SLC29A3 | solute carrier family 29 (nucleoside transporters), member 3 |
|  | 219442_at | C16orf67 | chromosome 16 open reading frame 67 |
|  | 219486_at | DUS2L | dihydrouridine synthase 2-like, SMM1 homolog (S. cerevisiae) |
|  | 219707_at | CPNE7 | copine VII |
|  | 219827_at | UCP3 | uncoupling protein 3 (mitochondrial, proton carrier) |
|  | 220096_at | RNASET2 | ribonuclease T2 |
|  | 220147_s_at | FAM60A | family with sequence similarity 60, member A |
|  | 220216_at | C8orf44 | chromosome 8 open reading frame 44 |
|  | 220430_at | GRRP1 | glycine/arginine rich protein 1 |
|  | 220661_s_at | ZNF692 | zinc finger protein 692 |
|  | 221141_x_at | EPN1 | epsin 1 |
|  | 221441_at | GSCL | goosecoid-like |
|  | 221649_s_at | PPAN | peter pan homolog (Drosophila) |
|  | 221758_at | ARMC6 | armadillo repeat containing 6 |
|  | 221783_at | WIZ | widely interspaced zinc finger motifs |
|  | 221820_s_at | MYST1 | MYST histone acetyltransferase 1 |
|  | 221855_at | LOC644096 | hypothetical protein LOC644096 |
|  | 221971_x_at | CTGLF1 /// CTGLF2 /// CTGLF6 /// CTGLF7 /// CTGLF9P | centaurin, gamma-like family, member 1 /// centaurin, gamma-like family, member 6 /// centaurin, gamma-like family, member 9 pseudogene /// centaurin, gamma-like family, member 7 /// centaurin, gamma-like family, member 2 |
|  | 221983_at | FAM134A | family with sequence similarity 134, member A |
|  | 222091_at | HPCAL4 | Hippocalcin like 4 |
|  | 40189_at | SET | SET translocation (myeloid leukemia-associated) |
|  | 40255_at | DDX28 | DEAD (Asp-Glu-Ala-Asp) box polypeptide 28 |
|  | 40640_at | NCAPH2 | non-SMC condensin II complex, subunit H2 |
|  | 43977_at | TMEM161A | transmembrane protein 161A |
|  | 44617_at | OGFOD2 | 2-oxoglutarate and iron-dependent oxygenase domain containing 2 |
|  | 48117_at | CCDC101 | coiled-coil domain containing 101 |
